# Supplementary material for: Discovering the 3′ UTR-mediated regulation of alpha-synuclein
Source: Oxford University Press journal article supplement (doi:10.1093/nar/gkx1048), 2017-10-20
Supplement: gkx1048_supp.zip [file gkx1048_supp.zip]

Archive with 2 entries (2 files):
- nar-01957-n-2017-File012.pdf
- nar-01957-n-2017-File013.xls
