# Supplementary material for: Discovering the 3′ UTR-mediated regulation of alpha-synuclein
Source: Oxford University Press journal article supplement (doi:10.1093/nar/gkx1048), 2017-10-20
Supplement: gkx1048_supp.zip [file gkx1048_supp.zip › nar-01957-n-2017-File012.pdf]

**SUPPLEMENTARY MATERIALS of**

**Discovering the 3' UTR-Mediated  
Regulation of Alpha-Synuclein**

Domenica Marchese<sup>1,2</sup>, Teresa Botta-Orfila<sup>1,2</sup>, Davide Cirillo<sup>1,2,3</sup>,  
Juan Antonio Rodriguez<sup>2,4</sup>, Carmen Maria Livi<sup>1,2,5</sup>, Rubén  
Fernández-Santiago<sup>6,7</sup>, Mario Ezquerra<sup>6,7</sup>, Maria J. Martí<sup>6,7</sup>, Elias  
Bechara<sup>1,2</sup>  
and Gian Gaetano Tartaglia<sup>1,2,8,9 \*</sup>

<sup>1</sup> Centre for Genomic Regulation (CRG), The Barcelona Institute for Science and Technology, Dr. Aiguader 88, 08003 Barcelona, Spain

<sup>2</sup> Universitat Pompeu Fabra (UPF), Barcelona, Spain

<sup>3</sup> Barcelona Supercomputing Center (BSC), Torre Girona c/Jordi Girona, 29, 08034 Barcelona, Spain

<sup>4</sup> Centro Nacional de Análisis Genómico, c/BaldiriReixac, 4, 08028 Barcelona, Spain

<sup>5</sup> IFOM, the FIRC Institute of Molecular Oncology, Via Adamello 16, 20139 Milan, Italy

<sup>6</sup> Institut d'Investigacions Biomèdiques August Pi i Sunyer (IDIBAPS), Barcelona, Spain.

<sup>7</sup> Parkinson's Disease and Movement Disorders Unit, Institut de Neurociències Hospital Clínic, CIBERNED, Barcelona, Spain.

<sup>8</sup> Institució Catalana de Recerca i Estudis Avançats (ICREA), Barcelona, Spain.

<sup>9</sup> on behalf of the Catalan MSA Registry (CMSAR) – Table 1.

\*Corresponding author: Gian Gaetano Tartaglia

### **catRAPID ranking analysis**

The algorithm developed by our group, *catRAPID* (1) was used to compute the interaction propensity of *SNCA* long 3'UTR with candidate proteins identified by protein arrays. *catRAPID omics* (2) ranks protein-RNA pairs based on the interactions score, presence of specific RNA motifs and RNA-binding domains. For RNA sequences > 1000 nt, the uniform fragmentation procedure is applied to determine the binding regions of a protein. Protein interactions were sorted by the median value of *catRAPID omics* ranking score (2) (**Fig. 1D**). We used *catRAPID Global Score* (3) to compute the interaction propensity of each RBP by integrating the interaction propensities over RNA fragments. Both the fragment scores and *Global Score* significantly discriminate interacting vs non-interacting pairs (**Supp. Fig. 1**).

### **RNA 3'end sequencing**

SH-SY5Y cells were *in vitro* differentiated towards a dopaminergic neuron-like phenotype by treatment with retinoic acid (RA), during four days, and 12-O-tetradecanoyl-phorbol-13-acetate (TPA), during three days. Total RNA was isolated from HeLa and *in vitro* differentiated SH-SY5Y cells with RNeasy Mini kit (Qiagen) and used for the first strand cDNA synthesis with OligodT carrying a 5' flanking region containing the sequence of the Unique Molecular Identifier (UMI) and the R2 sequencing adaptor. A first PCR amplification was performed with a pool of forward PCR specific primers annealing to different regions of the 3'UTR and carrying 5' flanking regions containing the R1 sequencing adaptor, and the Index primer, annealing to the R2 adaptor. This was followed by a second PCR amplification with Universal PCR primer and TS Oligo 2. After purification with AMPure WP Beads, the quality of the library was assessed on an Agilent Bioanalyzer DNA 1000 Chip. DNA libraries were subjected to 50 bases pair end sequencing.

### **RNA 3'end sequencing data analysis**

The unique molecular identifier (UMI) was transferred from the second read pair to the first one's header and the left pair read was mapped to the gene of interest. The UMI in the header was used to check PCR duplicates and to group together reads with multiple mapping. In that case only the read with the largest coordinate was counted. Every mapping smaller than 25 nt was removed and a tolerance of +8 bases for reads count was admitted to avoid PCR artifacts. The ratio on the total number of reads mapping to those intervals was calculated.

### **RNA affinity purification**

33 moles of biotinylated RNA were bound to Streptavidin magnetic beads (Dynabeads M-280, Invitrogen) previously blocked with 100 ng/ul of tRNAs in NT2 buffer (50 mM Tris-HCl pH 7.5, 150 mM NaCl, 1 mM MgCl<sub>2</sub>, 0.05% NP-40, 1 mM DTT). 2 mg of SH-SY5Y total cell extracts were added and incubated for 1 hour at room temperature, in presence of 1X Protease Inhibitors cocktails (Sigma Aldrich), 320 ng/ul Heparin (Sigma Aldrich), 4.3 ug/ul of Creatine Phosphate and 80 ng/ul of Creatine Kinase. Samples were cross-linked with 6000x100 uJ/cm<sup>2</sup> of energy and 254 nm UV light. Beads with RNA-protein complexes were washed two times with buffers NT2, HSB300, HSB500, HSB1000 with increasing salt

concentration. Bound proteins were eluted by RNase cocktail digestion in elution buffer (10 mM Tris-HCl pH 7.2, 1 mM MgCl<sub>2</sub>, 40 mM NaCl). Eluted proteins from 3'UTRS RNA, 3'UTRL RNA and negative control samples were analyzed by western blot for the detection of ELAVL1, TIAR and FMR1 negative control.

The RNA affinity purification was done in technical triplicates and the western blot was quantified using ImageJ analysis software. Statistical significance of binding differences, were determined by a Student's T-test

### **RNA electrophoretic mobility shift assay**

5 fmoles of probe were incubated with increasing concentrations of GST-TIAR or GST-ELAVL1 proteins (0, 100, 200 and 500 nM) in 1 X binding buffer (10 mM Tris-HCl, 150 mM NaCl, 0.1 mM DTT, 0.1 mM EDTA, 0.01% NP-40, 1% glycerol, 500 µg/ml yeast tRNAs). Samples were UV cross-linked and ran in a 4% acrylamide gel. After drying for 30 min the gel was exposed to a phosphor screen (GE Healthcare) during adequate time (~1 hour) and the radioactivity signal was detected by a Typhoon Trio instrument (GE Amersham).

For the competition assay 5 fmoles of radiolabeled probe were incubated with increasing concentrations of the non-labeled probes for A, B or C fragments (0.1 nM, 1 nM and 10 nM final concentration) during 10 minutes at room temperature. TIAR or ELAVL1 proteins were added at the dissociation constant concentration (200 nM for TIAR and 100 nM for ELAVL1) in 1X binding buffer and incubated for 15 minutes at room temperature. Samples were cross-linked and analyzed on a 4% acrylamide gel as described above. For 100, 200 and 500 nM of TIAR and ELAVL1, we measured the following protein:RNA ratios 30:1, 60:1 and 150:1 for fragment A, 38:1, 76:1 and 190:1 for fragment B, and 45:1, 90:1 and 225:1 for fragment C).

### **TIAR and ELAVL1 knockdown**

HeLa cells (courtesy of Luciano Di Croce's lab) were cultured under standard conditions. TIAR and ELAVL1 short hairpin RNA (shRNA) constructs were generated by annealing single stranded complementary oligonucleotides (Sigma Aldrich) and cloned in pLKO.1 TRC-puro plasmid digested with AgeI and EcoRI.

60% confluent Hek293T cells were transfected with pLKO-shRNA (TIAR shRNA, ELAVL1 shRNA), or pLKO-empty vector (negative control), pCMV-VSV-G and pCMVDR-8.91 plasmids, to produce pLKO-shRNA-containing lentivirus. Medium containing lentivirus was collected after 40 and 48 h, filtered, supplemented with 5 µg/ml polybrene (Sigma Aldrich) and used to infect HeLa cells. Infected cells were selected with 2.5 µg/ml puromycin (Sigma Aldrich) and the efficacy of the knockdown was checked 24 h after selection by real-time PCR and western blot. Samples collected 3 days after selection were used to check the expression of  $\alpha$ -synuclein at the mRNA and protein level.

RNA isolation and RT-qPCR were performed as described above and relative expression levels were calculated with the  $\Delta\Delta C_q$  method, using GAPDH as well as ACTB, PP1B and RPS18 and as reference genes. Average values of biological replicates were calculated and Wilcoxon's test was performed to assess for significant differences in gene expression between knockdown and control cells.

Proteins were extracted by lysing the cells with Pierce lysis buffer (Thermo Fisher Scientific) supplemented with Protease and Phosphatase Inhibitors (Thermo Fisher Scientific). Samples were analyzed by western blot using following antibodies: ab93432 (Abcam) for human  $\alpha$ -synuclein, ab54987 (Abcam) for ELAVL1, sc-1749 (Santa Cruz) for TIAR and ab7291 (Abcam) for  $\beta$ -tubulin, which was used as internal reference protein for normalization with ImageJ (12).

### **TIAR and ELAVL1 overexpression**

HeLa cells at 80-90% of confluency were transfected with pCMV-AC-ELAVL1 (OriGene Technologies) for ELAVL1 overexpression or pEGFP\_G-TIAR (Clontech, courtesy of Valcarcel's Lab) for TIAR overexpression, using Lipofectamine 2000 according to manufacturer's instructions. pcDNA3.1-EGFP was used as a control plasmid for both overexpression experiments. Cells were collected 48 h after transfection and *SNCA* mRNA and protein levels were checked by real-time PCR and western blot (see above). The mean values of technical triplicates were calculated.

### **High throughput microRNAs expression analysis**

We tested the level of expression of microRNAs in HeLa using a high throughput miRNAs expression analysis. In this approach, we hybridized total RNA extracted with miRNeasy kit (Qiagen) on a GeneChip miRNA 4.0 array (Thermo Fisher Scientific) that was analyzed with the Transcriptome Analysis Console (TAC) software (Thermo Fisher Scientific).

We obtained a list of 4628 microRNAs with a fluorescence signal in the range 0.56 - 14.1 ( $\log_2$  scale) following a gamma distribution (shape parameter = 2.15; scale parameter = 1.07; fitting correlation >0.90). Around 10% of all microRNAs (432 cases) had a fluorescence signal >5, which is associated with good detectability (>1 standard deviation from the mean). Indeed, accurate quantification of expression levels has been previously achieved for cancer microRNAs (7) with fluorescence signals >5 in HeLa micro-arrays (including miR-776-36, miR-21-5-p, miR-378a-3p, miR-3156-5p, miR-181a-5p, miR-125a-5p and miR-320a with respective intensities of 5.82, 8.04, 9.89, 10.52, 10.53 11.40 and 13.34 in our assay). Among the microRNAs overlapping with TIAR and ELAVL1 binding sites we found hsa-miR-1224-5p and hsa-miR-3065-5p (non-conserved) whose expression levels are below the threshold (intensities: values 4.0 and 3.5), indicating poor expression in HeLa cells. In accordance with this result, an external dataset taken from a published high throughput small RNA sequencing analysis (8) reveals nearly undetectable levels of expression of microRNAs overlapping with TIAR and ELAV1 binding sites (**Suppl. Table 3**).

Overall, our analysis indicates that microRNAs levels of expression are poor in two independent HeLa cell lines, as also directly observed for miR-7 (micro-array intensity: 2.71) and miR-153 (micro-array intensity: 1.34) by TaqMan assay. We ruled out that these miRNAs might have any relevant role in TIAR and ELAVL1 dependent SNCA regulation in the cell model used for our functional assays.

### Measurement of luciferase mRNA levels

RNA was purified with *RNeasy* Mini kit and reverse transcribed with SuperScript III First-Strand synthesis SuperMix for qRT-PCR (Invitrogen). Real-time PCR was performed with 10 ng of cDNA template, 250 uM forward and reverse primers and 1X Sybr Green PCR master mix (Applied biosystem). The mRNA of *Renilla* luciferase was used to normalize *Firefly* luciferase mRNA levels.

### Polysome Profiling

HeLa control, TIAR and ELAVL1 knockdown cells were grown under standard conditions. Incubation with the translation inhibitor cycloheximide (100 µg/ml) was performed at 70% cell confluence, for 15 min at 37°C. Cells were washed with cold 1X PBS and lysed on ice with Polysome lysis buffer (10 mM Tris-HCl pH 7.4, 100 mM KCl, 10 mM MgCl<sub>2</sub>, 1% Triton-X 100, 2.5 U/ml Turbo DNase, 2 mM DTT, 1X protease inhibitors, 100 µg/ml cycloheximide, 200 U/ml Suprase In).

Lysates from three 10 cm<sup>2</sup> dishes were transferred to a tube containing 425-600 microns glass beads (Sigma). After vortex and centrifugation for 5 min at 5000 g at 4°C, lysates were transferred to new tubes and immediately snap-frozen in liquid nitrogen. 9-12 OD<sub>260</sub> were loaded onto a 10-50% sucrose gradient in a Beckman SW 41Ti rotor and subjected to ultracentrifugation for 150 min at 35000 g at 4°C using a Beckman Optima XL-100 K centrifuge. The gradients were fractionated by upward displacement using a gradient fractionator connected to a BioRad Econo UV monitor, peristaltic pump, and fraction collector. 5 ng of *in vitro* synthesized *firefly* luciferase RNA were added to each fraction as an internal control for RNA precipitation efficiency. Samples were precipitated overnight at -20°C with 100% ethanol and then the pellets were washed with 80% ethanol and resuspended before isolating RNA using Maxwell 16 LEV simply RNA cells kit (Promega).

A fixed volume of RNA was used for reverse transcription and real-time PCR (see above). In order to have a standard curve-based relative quantification, we used serial dilutions of a cDNA sample to which we assigned arbitrary values for each of the genes of interest (e.g. 100 AU to 12.5 ng, 10 AU to 1.25 ng, 1 AU to 0.125 ng, etc.). The values of *SNCA* for each polysomal fraction ( $x_1, x_2, \dots, x_{16}$ ) obtained by interpolation with the standard curve, were then normalized to the *Firefly* luciferase signal, which was used as internal control RNA to correct for differences in RNA precipitation efficiencies.

The total amount of *SNCA* in all fractions was calculated as the sum of the corrected values. The ratio ( $x_{n=1-16}/\sum x_n$ ) against the total for each fraction was calculated and represented as percentage of *SNCA* mRNA in each polysomal fraction. The average and standard deviation of biological triplicates were calculated for each condition (control, TIAR kd and ELAVL1

kd) and the results were compared. ACTB was used as a negative control since its distribution along the polysomal fractions is not affected by TIAR or ELAVL1 knockdown.

### **trans-eQTLs analysis**

For trans eQTLs analysis, we selected a comprehensive genomic region including *TIAR*-*INPP5F* genes plus ~84 kb upstream *TIAR* and ~94 kb downstream *INPP5F*. The vcf files containing SNP data for the region chr10:121250246-121682830 (hg19) were downloaded from the 1000 Genomes Project (4). After filtering the region for variants only present in European ancestry individuals (CEU population; n=85) with an allele frequency of at least 5%, we calculated trans-eQTLs in relation to *SNCA* in all available brain-related tissues in GTEx, namely: anterior cingulate cortex, caudate basal ganglia, cerebellar hemisphere, cerebellum, brain cortex, frontal cortex, hippocampus, hypothalamus, nucleus accumbens basal ganglia and putamen basal ganglia. We therefore generated p-values of trans-eQTL association for *SNCA* for all the 892 SNPs for every tissue (taking into account that data were not always available for all 892 SNPs in all tissues).

To test the likelihood of obtaining such p-values for *SNCA* trans eQTLs ( $9e^{-5}$ ), we selected 100 random genes from the protein array not interacting genes. These genes were matched by length with *TIAR* (+/- 15 kb). Next, we identified the corresponding SNP variants, keeping again only variants with a 5% allele frequency in CEU population. To avoid testing redundant information, linkage disequilibrium (LD) blocks within this dataset were estimated by PLINK's pruning algorithm (5) with an  $R^2 > 0.8$  and using a sliding window of 50 SNPs, moving it 5 SNPs per iteration and using CEU individuals as reference. The average number of LD blocks (or tag-SNPs per gene) was 34 (s.d=19). *TIAR* contains 38 tag-SNPs, falling in percentile 67 of the distribution. This confirms that *TIAR* is comparable within our random sample. All 22,818 selected tag-SNPs for the 100 random genes were tested for being trans-eQTLs for *SNCA* in 10 brain tissues in GTEx project. A total sum of 223 independent tag-SNPs for the ten tissues were tested regarding *TIAR*. The random sample of tag-SNPs (n=22,818) returned only 3 SNPs reaching *TIAR* SNP highest p-value ( $9e^{-5}$ ). A binomial test was applied to show that our results are unlikely to be observed by chance (binomial test pvalue = 0.02).

### **GWAS analysis**

GWAS p-values for *TIAR* region were downloaded from the PDgene web (<http://www.pdgene.org/view?gene=TIAR1>), which reports p-values from the GWAS meta-analysis by Nalls et al. (6). PLINK (5) was used to test whether our significant *SNCA* trans eQTLs in *TIAR* region presented LD with the top significant SNPs associated to PD.

## **Appendix**

### **Primer for SNCA 3'UTR cloning in pBSK plasmid**

ApaI-Syn3UTR Fw

CGGGGCCCCGAAATATCTTTGCTCCCAGT

NotI-Syn3UTRS Rv GCGCGGCCGCGcTATTTTGTCAATGAGATAACGT

NotI-Syn3UTRL Rv GCGCGGCCGCGTATTTTCATATATGTATATATT

BamHI-Syn3UTRM Rv

CGGGATCCCATGGTCGAATATTATTTATTG

Syn3UTRL flanking Fw GAAGGGTATCAAGACTACGAACCTGAAGCC

Syn3UTRL flanking Rv GAACAAGGGTTTTAGGAGCTCTTTGTAAG

### **Primers for construct sequencing**

T7 promoter TAATACGACTCACTATAGGG

T3 promoter GCAATTAACCCTCACTAAAGG

SYN3UTRLseq1 ACTGTTGTTTGATGTGTATG

Syn3UTRLseq2GCCTAGAATTCATATATTTGGC

Syn3UTRLseq3CCTAGAATTCATATATTTGGC

### **Primers for real-time PCR**

SNCA Fw AGGGTGTCTCTATGTAGG

SNCA Rv ACTGTCTTCTGGGCTACTGC

TIAR Fw GCCAATGGAGCCAAGTGTAT

TIAR Rv CATATCCGGCTTGGTAGGA

ELAVL1 Fw AAAACCATTAAGGTGTCGTATGCTC

ELAVL1 Rv CCTCTGGACAAACCTGTAGTCTGAT

GAPDH Fw GACCACAGTCCATGCCATC

GAPDH Rv TTCAGCTCAGGGATGACCTT

ACTB Fw GGACCTGACTGACTACCTCAT

ACTB rv CGTAGCACAGCTTCTCCTTAAT

### **Primers for Gibson cloning**

pGL4-TK-FL linearization

pGL4-TK-FL Fw

CTTCGAGCAGACATGATAAGATACATTGATGAGTTT  
pGL4-TK-FL Rv  
TTATTACACGGCGATCTTGCCGC

3'UTRs amplification from pBSK plasmid

All\_3UTRs\_Gibs Fw  
GCAAGATCGCCGTGTAATAAGAAATATCTTTGCTCCCAGT  
3UTRS-Gibs Rv  
CTTATCATGTCTGCTCGAAGTCCACCGTATTTTTGCAATGAGATAACGT  
3UTRM-Gibs Rv  
TTATCATGTCTGCTCGAAGCGGCGTGCATGGTCGAATATTATTTATTG  
3UTRL-Gibs Rv  
CTTATCATGTCTGCTCGAAGTATTTTCATATATGTATATATT

**Primers/Gibson oligos for PAS deletion**

$\Delta(262-267)$  Fw AACACCTAAGTGAAGTACTACCACTTATTTCTAAATC  
 $\Delta(262-267)$  Rv TTGTTTAAACATCGTAGATTGAAGCC

$\Delta(262-267)$ Gibson oligos

Fw: GCTTCAATCTACGATGTTAAAACAAAACACCTAAGTGAAGTACTACCACTTATT  
Rv: AATAAGTGGTAGTCACTTAGGTGTTTTGTTTTAACATCGTAGATTGAAGC

$\Delta(468-473)$ Fw TACTAAATATGAAATTTTACCATTTTGCG  
 $\Delta(468-473)$ Rv GGTGCATAGTTTCATGCTCACAT

$\Delta(468-473)$ Gibson oligos

Fw: ATATGTGAGCATGAACTATGCACCTACTAAATATGAAATTTTACCATT  
Rv: AAATGGTAAATTTTCATATTTAGTAGGTGCATAGTTTCATGCTCACATAT

$\Delta(529-553)$ Fw ACGTTATCTCATTGCAAAAATATT  
 $\Delta(529-553)$ Rv TACAAACACAAGTGAATAAAACACA

$\Delta(529-553)$ Gibson oligos

Fw: TGTGTTTTATTCACTTGTGTTTGTAACGTTATCTCATTGCAAAAATATTT  
Rv: AAATATTTTTGCAATGAGATAACGTTACAAACACAAGTGAATAAAACACA

$\Delta(1054-1059)$ Fw TAATATTCGACCATGAATAAAA  
 $\Delta(1054-1059)$ Rv GTCAGAAAGGTACAGCATTAC  
 $\Delta(1054-1059)$ Fw TAATATTCGACCATGCACGCCG (for 3UTRM)

$\Delta(1054-1059)$ Gibson oligos

Fw: GGTGTGAATGCTGTACCTTTCTGACTAATATTCGACCATGAATAAAAAA  
Rv: TTTTTTTATTCATGGTCGAATATTAGTCAGAAAGGTACAGCATTACACC

### **Primers for real-time PCR of luciferase assay**

Luc FW: ACCTTCGTGACTTCCCATT  
Luc RV: GGTACTGCCACTACTGTTCAT

Ren FW: TTGAATCATGGGATGAATGG  
Ren RV: ATGTTGGACGACGAACTTCA

Luc-3UTRS FW: TGTGAGCATGAACTATGCACCT  
Luc-3UTRS RV: TCATGTCTGCTCGAAGTCCACC

Luc-3UTRM FW: TGGGGAAGCTGTTGTTTGATGTGT  
Luc-3UTRM RV: CGGCGTGCATGGTCGAATATTA

Luc-3UTRL FW: GTGAATGCTGTACCTTTCTGACTAAT  
Luc-3UTRL RV: CAGAGCCTTGAATGTGCTAATATGT

### **Short hairpin RNAs for knockdown**

shTIAR forward oligo:  
CCGGCCCATATTGCTTTGTGGAATTCTCGAGAATTCCACAAAGCAATATGGGTTT  
TTG

shTIAR reverse oligo:  
AATTCAAAAACCCATATTGCTTTGTGGAATTCTCGAGAATTCCACAAAGCAATAT  
GGGT

shELAVL1 forward oligo:  
CCGGTACCAGTTTCAATGGTCATAACTCGAGTTATGACCATTGAACTGGTATTTT  
TG

shELAVL1 reverse oligo:  
AATTCAAAAATACCAGTTTCAATGGTCATAACTCGAGTTATGACCATTGAACTG  
GTA

shTIAR forward oligo 2:  
CCGGATTCATGATAGGCTTCGATTTCTCGAGAAATCGAAGCCTATCATGAATTTTT  
TG

shTIAR reverse oligo 2:  
CAAAAAATTCATGATAGGCTTCGATTTCTCGAGAAATCGAAGCCTATCATGAATC  
CGG

shELAVL1 forward oligo 2:  
CCGGCGAGCTCAGAGGTGATCAAAGCTCGAGCTTTGATCACCTCTGAGCTCGTTT  
TTG

shELAVL1 reverse oligo 2:

CAAAAACGAGCTCAGAGGTGATCAAAGCTCGAGCTTTGATCACCTCTGAGCTCGC  
CGG

#### **Primers for 3'end RNA sequencing**

R1-SNC608

CCCTACACGACGCTCTTCCGATCTtatgcctgtggatcctgaca

R1-SNC909

CCCTACACGACGCTCTTCCGATCTctgtggattttgtggcttca

R1-SNC1154

CCCTACACGACGCTCTTCCGATCTtgagcatgaaactatgcacct

R1-SNC1432

CCCTACACGACGCTCTTCCGATCTctgaagcaacactgccagaa

R1-SNC1713

CCCTACACGACGCTCTTCCGATCTttggtgtgaatgtgtaccttt

R1-SNC2004

CCCTACACGACGCTCTTCCGATCTtgcccttaaacatcgttga

R1-SNC2353

CCCTACACGACGCTCTTCCGATCTatatattggcgctggtgag

R1-SNC2787

CCCTACACGACGCTCTTCCGATCTtgacggaattttgagcagtg

R1-SNC3013

CCCTACACGACGCTCTTCCGATCTggtcggctttacaaaacag

R2-UMI-dT16

VNTTCAGACGTGTGCTCTTCCGATCTNNNNNNNNNNTTTTTTTTTTTTTTTTVN

#### **Antibodies**

Rabbit polyclonal anti-alpha Synuclein antibody [ab93432]

Mouse monoclonal anti-HuR/ELAVL1 [ab54987]

Goat polyclonal anti-TIAR [sc-1749]

Rabbit polyclonal anti-FMRP [ab69815]

Mouse monoclonal anti-alpha Tubulin antibody [ab7291]

Protein G HRP-conjugate (Millipore, 18-161)

Rabbit polyclonal secondary antibody to Mouse IgG-HRP [ab97046]

1. Bellucci,M., Agostini,F., Masin,M. and Tartaglia,G.G. (2011) Predicting protein associations with long noncoding RNAs. *Nat. Methods*, **8**, 444–445.
2. Agostini,F., Zanzoni,A., Klus,P., Marchese,D., Cirillo,D. and Tartaglia,G.G. (2013) catRAPID omics: a web server for large-scale prediction of protein-RNA interactions. *Bioinformatics*, 10.1093/bioinformatics/btt495.
3. Cirillo,D., Blanco,M., Armaos,A., Bunes,A., Avner,P., Guttman,M., Cerase,A. and Tartaglia,G.G. (2016) Quantitative predictions of protein interactions with long noncoding RNAs. *Nat. Methods*, **14**, 5–6.
4. 1000 Genomes Project Consortium, Auton,A., Brooks,L.D., Durbin,R.M., Garrison,E.P., Kang,H.M., Korbel,J.O., Marchini,J.L., McCarthy,S., McVean,G.A., *et al.* (2015) A global reference for human genetic variation. *Nature*, **526**, 68–74.
5. Purcell,S., Neale,B., Todd-Brown,K., Thomas,L., Ferreira,M.A.R., Bender,D., Maller,J., Sklar,P., de Bakker,P.I.W., Daly,M.J., *et al.* (2007) PLINK: a tool set for whole-genome association and population-based linkage analyses. *Am. J. Hum. Genet.*, **81**, 559–575.
6. Nalls,M.A., Pankratz,N., Lill,C.M., Do,C.B., Hernandez,D.G., Saad,M., DeStefano,A.L., Kara,E., Bras,J., Sharma,M., *et al.* (2014) Large-scale meta-analysis of genome-wide association data identifies six new risk loci for Parkinson’s disease. *Nat. Genet.*, **46**, 989–993.
7. Ferracin,M., Lupini,L., Salamon,I., Saccenti,E., Zanzi,M.V., Rocchi,A., Da Ros,L., Zagatti,B., Musa,G., Bassi,C., *et al.* (2015) Absolute quantification of cell-free microRNAs in cancer patients. *Oncotarget*, **6**, 14545–14555.
8. Grolmusz,V.K., Tóth,E.A., Baghy,K., Likó,I., Darvasi,O., Kovalszky,I., Matkó,J., Rácz,K. and Patócs,A. (2016) Fluorescence activated cell sorting followed by small RNA sequencing reveals stable microRNA expression during cell cycle progression. *BMC Genomics*, **17**, 412.
9. Dassi,E., Malossini,A., Re,A., Mazza,T., Tebaldi,T., Caputi,L. and Quattrone,A. (2012) AURA: Atlas of UTR Regulatory Activity. *Bioinforma. Oxf. Engl.*, **28**, 142–144.
10. Dassi,E., Re,A., Leo,S., Tebaldi,T., Pasini,L., Peroni,D. and Quattrone,A. (2014) AURA 2: Empowering discovery of post-transcriptional networks. *Transl. Austin Tex*, **2**, e27738.

## SUPPLEMENTARY TABLES

**Supp. Table 1.** List of control individuals, PD and MSA cases used for analysis of protein levels in motor cortex post-mortem biopsies. Abbreviations: ARP=Alzheimer's disease related pathology (NFT: neurofibrillary tangles I-VI according to Braak, amyloid plaques A-C according to CERAD); iLBD: incidental Lewy-body disease; SVD: small vessel disease, AgD: argyrophilic grain pathology; OPCA, Olivopontocerebellar atrophy; SND, striatonigral degeneration; PD-D: Parkinson's disease with dementia; n.a.: not available; PMD: postmortem delay.

**Supp. Table 2.** List of control individuals, PD and MSA cases used for analysis of protein levels in primary fibroblasts obtained from skin biopsies. Abbreviations: AAO: Age at onset; MSA-P: Multiple System Atrophy-parkinsonian type; sPD: sporadic Parkinson's Disease; L2PD: LRRK2-associated Parkinson's Disease, n.a.: not available.

**Supp. Table 3.** miRNAs overlapping TIAR and ELAVL1 binding sites (coordinates relative to the 3' UTR). In accordance with our results, an external dataset taken from a published high throughput small RNA sequencing analysis reveals undetectable expression levels of TIAR/ELAVL1 overlapping miRNAs in HeLa cells (8).

**Supp. Table 4.** We identified 67 SNPs: 5 SNPs fall into ELAVL1 binding sites, 3 in TIAR binding sites and 2 are located in ELAVL1/TIAR shared binding regions. 6 of the SNPs overlapping with TIAR/ELAVL1 binding sites have a PHRED score >10.

## SUPPLEMENTARY FIGURES

**Supp. Fig. 1. Comparison between predicted and observed RBP interactions with *SNCA* long 3' UTR.** **A)** *catRAPID omics* (black curve) and *catRAPID Global Score* (red curve) efficiently identify RBP interactions revealed by protein-arrays. Comparing strong signal RBPs (top 50 and bottom 50 interactions ranked by signal to background ratio), we obtained Area under the ROC curve of 0.78 for *catRAPID omics* and 0.92 for *catRAPID Global Score*. **B)** Correlation between *catRAPID omics* scores and number of RBP binding sites reported in AURA (9, 10) (Pearson's correlation of 0.90; hyperbolic tangent with two fitting parameters used).

**Supp. Fig. 2.** Relative mRNA abundances of the three constructs carrying the sequence of *SNCA* 3'UTR S (575 nt), M (1074 nt) and L (2530 nt) at the 3' of luciferase coding sequence measured by qPCR. \*p-value<0.05 calculated with Wilcoxon's test.

**Supp. Fig. 3.** RNA and protein expression levels upon depletion of TIAR and ELAVL1. A-B Quantitative real time PCR of *SNCA*, TIAR and ELAVL1 mRNA relative expression in HeLa control and KD cells using two different shRNAs for each protein. Three different housekeeping genes (ACTB, PPIB and RPS18) for normalization of gene expression are compared. C-D western blot analysis of *SNCA*, TIAR and ELAVL1 in control and KD conditions.

**Supp. Fig. 4.** RNA affinity purification in presence and absence of UV cross-linking. TIAR and ELAVL1 are co-purified with *in vitro* synthesized RNA of *SNCA* 3'UTR long and short in presence (+) or absence (-) of UV cross-linking proving that the interaction observed

is not due to a technical artifact of the cross-linking. Also in this condition ELAVL1 binds to *SNCA* 3'UTR long with higher avidity than *SNCA* 3'UTR short, while TIAR shows similar binding ability for both 3'UTRs.

**Supp. Fig. 5.** Fragments A, B and C: ELAVL1 and TIAR equilibrium dissociation constants.

**Supp. Fig. 6. TIAR, ELAVL1 and  $\alpha$ -synuclein protein expression in primary cultured fibroblasts from human skin biopsies.** (A)  $\alpha$ -synuclein TIAR and ELAVL1 relative protein level in primary fibroblasts of control individuals, idiopathic PD, LRRK2-associated PD and MSA patients measured by western blot. (B) and (C) Normalized average values represented in the boxplot show a significant downregulation of TIAR protein in PD and MSA patients with respect to healthy control group (\*p-value < 0.05, Wilcoxon's test). (D) and (E) Similar results were observed for TIAR protein when idiopathic PD and LRRK2-associated PD cases are considered as separate groups, while in the case of ELAVL1, a significant upregulation is measured in LRRK2-associated PD cases with respect to control individuals. (\*p-value < 0.05, Wilcoxon's test).

**Supp. Fig. 7. Normalized *SNCA* expression associated to rs7912058 variant.** Ranked normalized *SNCA* gene expression in human *hippocampus* of rs7912058-C homozygous ('Homo Ref'), rs7912058-CG heterozygous (Het) and rs7912058-G homozygous (Homo Alt) individuals. Data retrieved from GTEx project. The minor allele of the leading single nucleotide polymorphism (SNP) rs7912058-G is associated with decreased expression of *SNCA*.

A

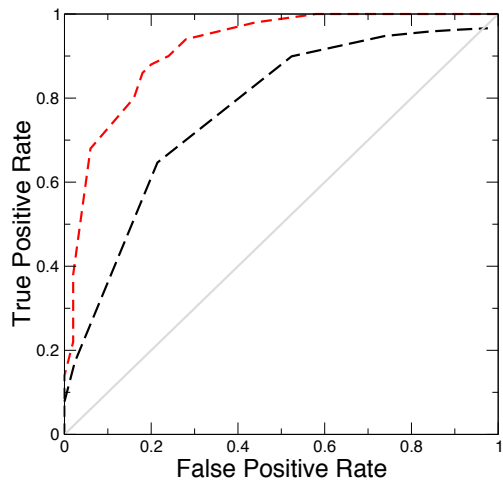

B

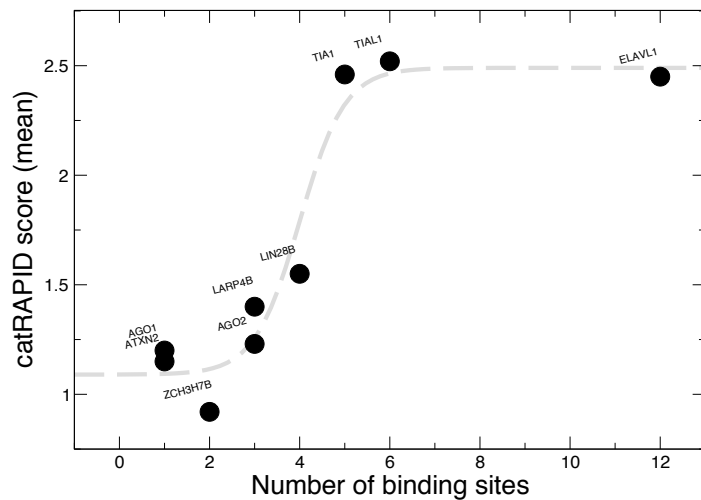

Supp. Fig. 1

Supp. Fig. 2

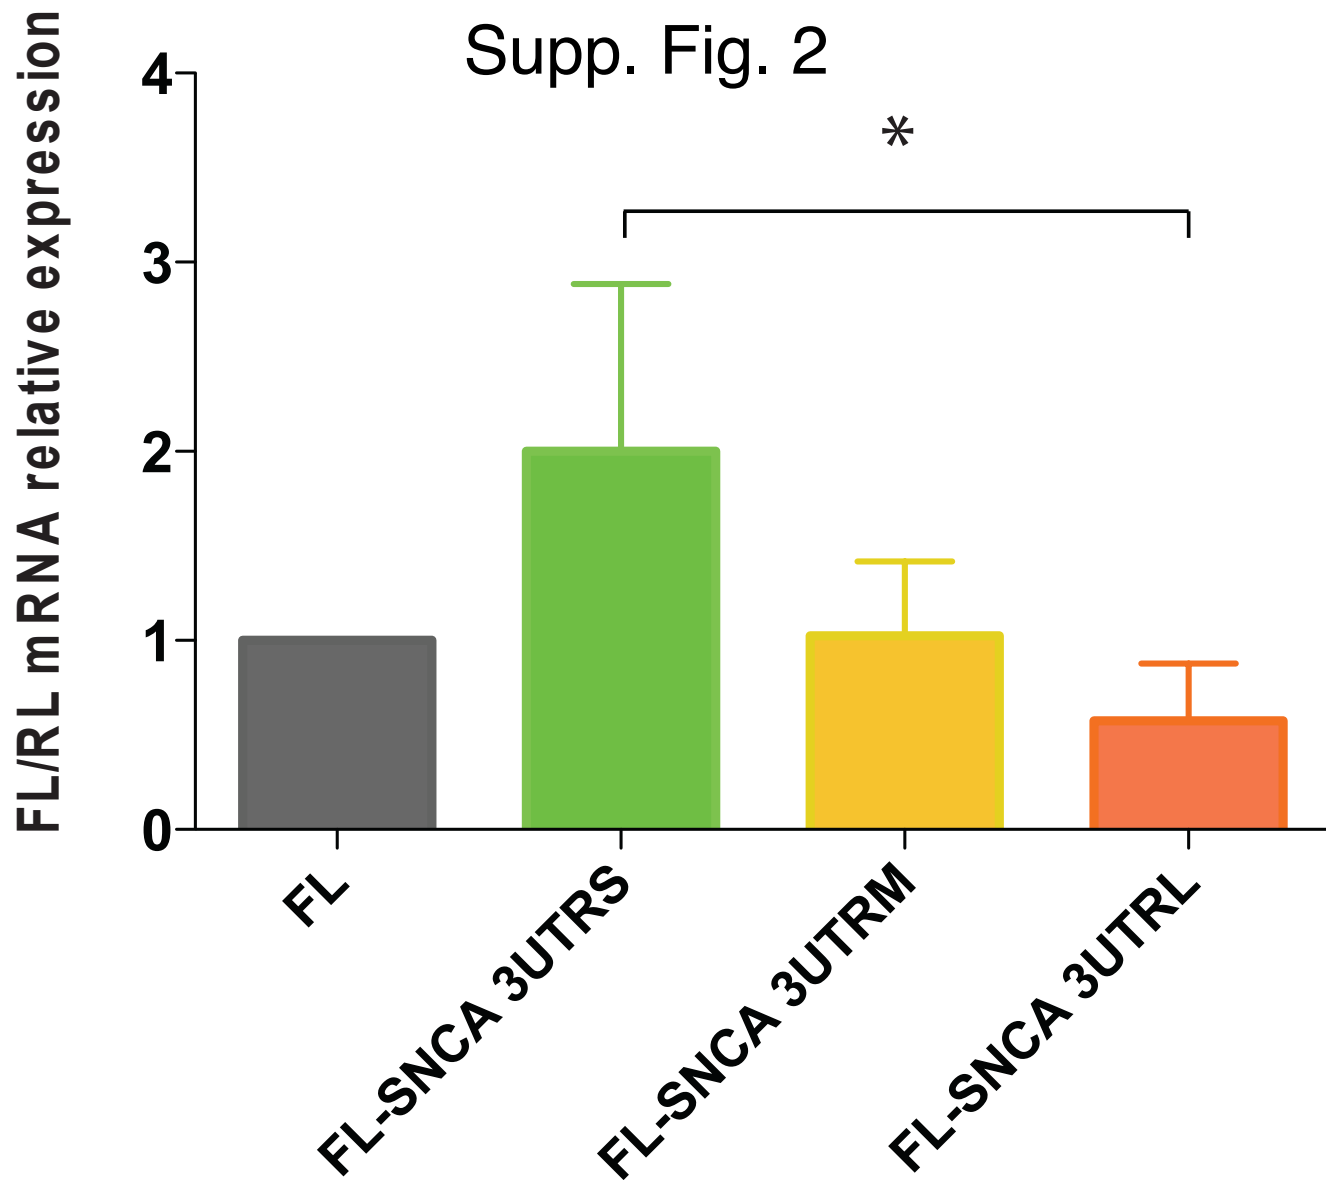

Supp. Fig.3

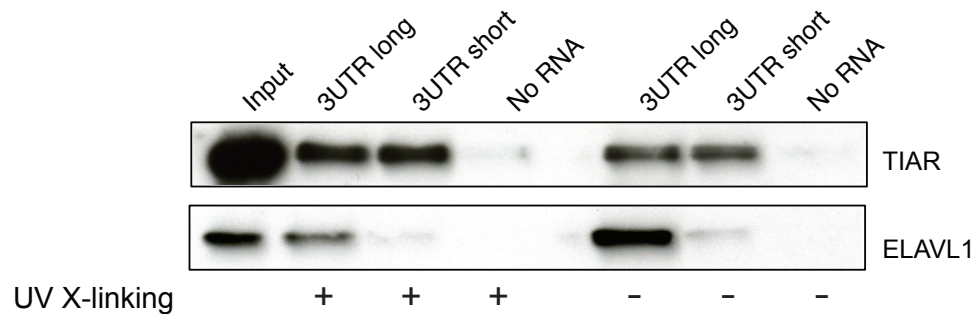

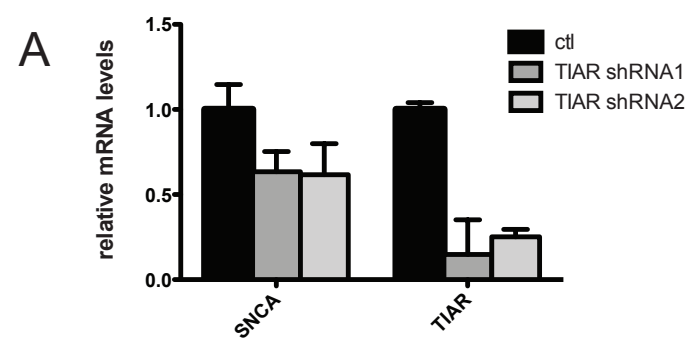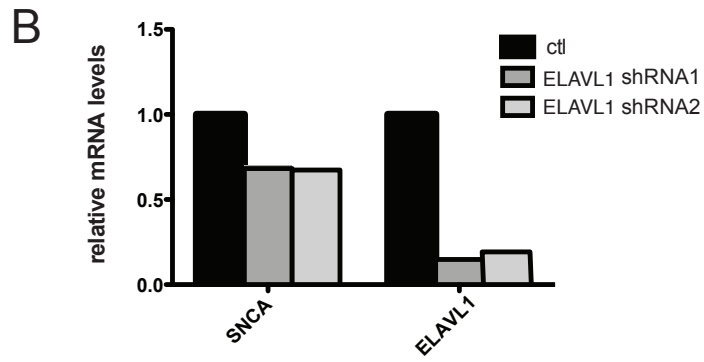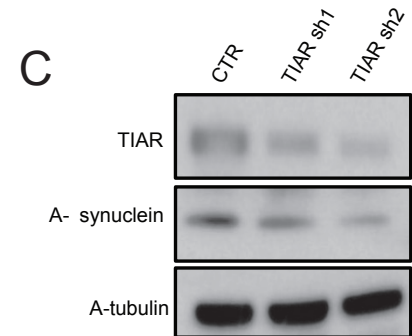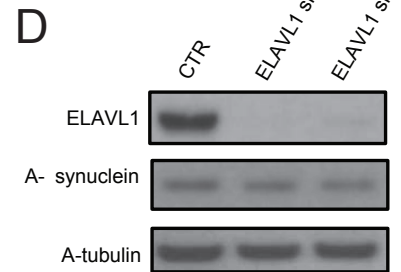

Supp. Fig. 4

**Fragment A**

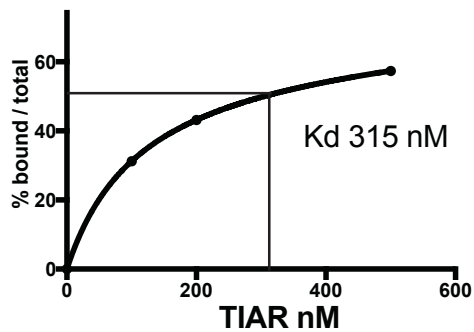

**Fragment A**

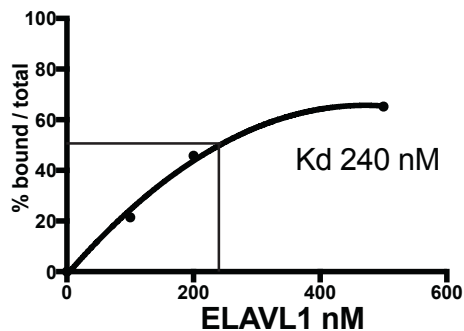

**Fragment B**

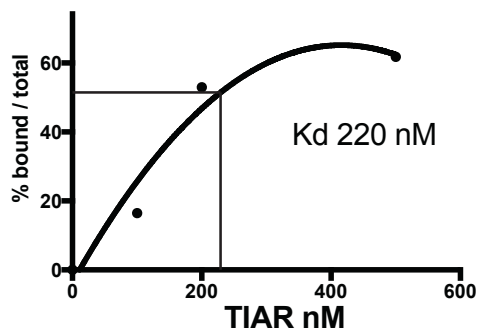

**Fragment B**

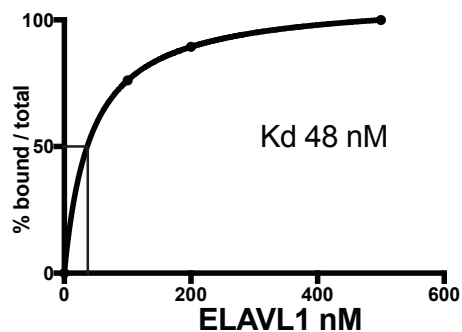

**Fragment C**

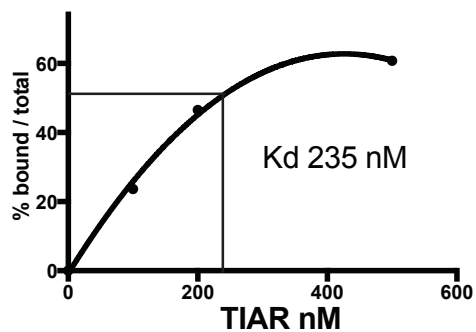

**Fragment C**

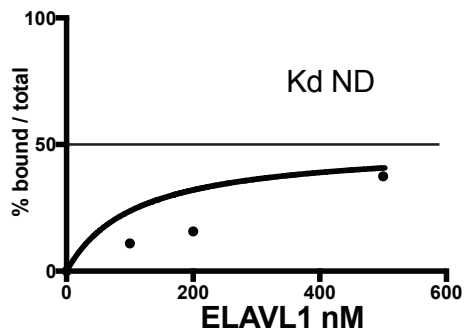

A

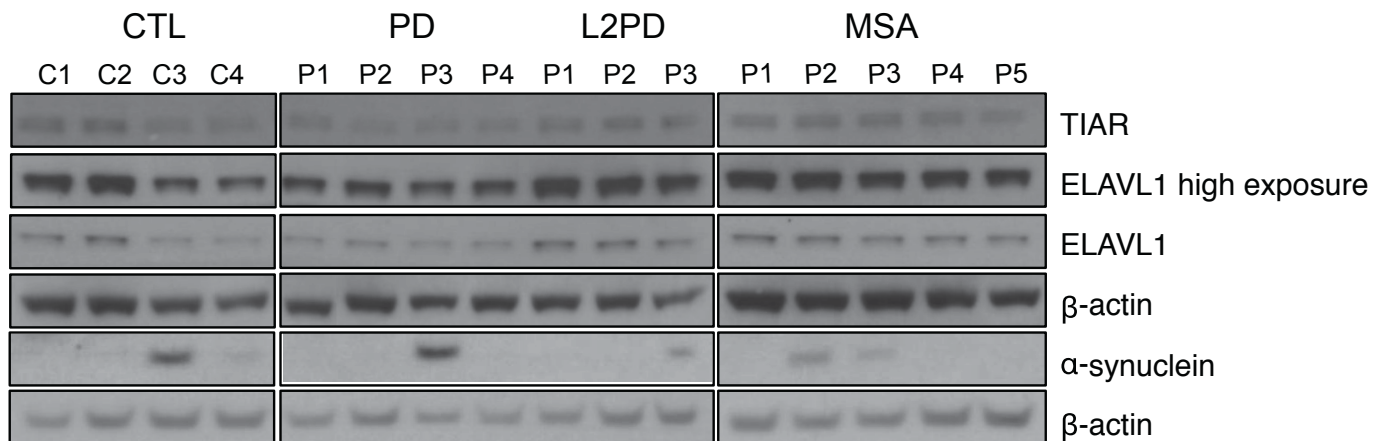

B

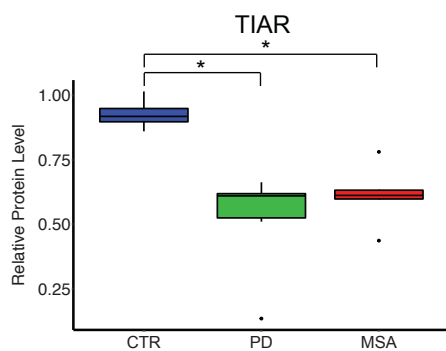

C

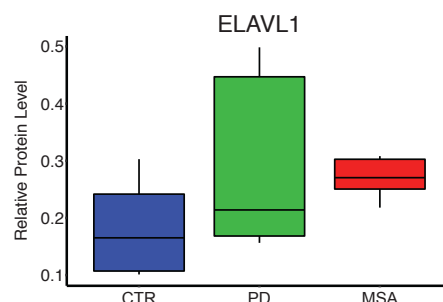

D

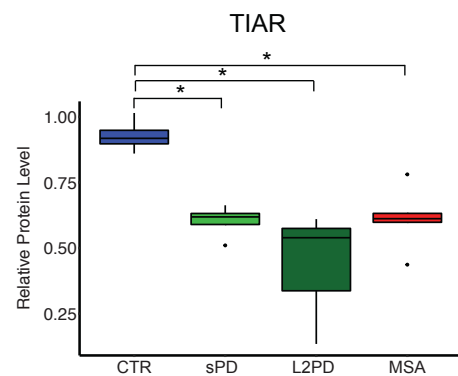

E

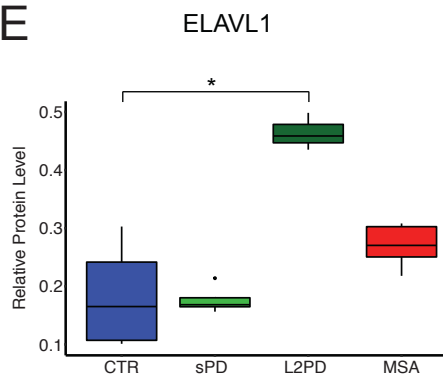

Brain\_Hippocampus eQTL rs7912058 ENSG00000145335.11

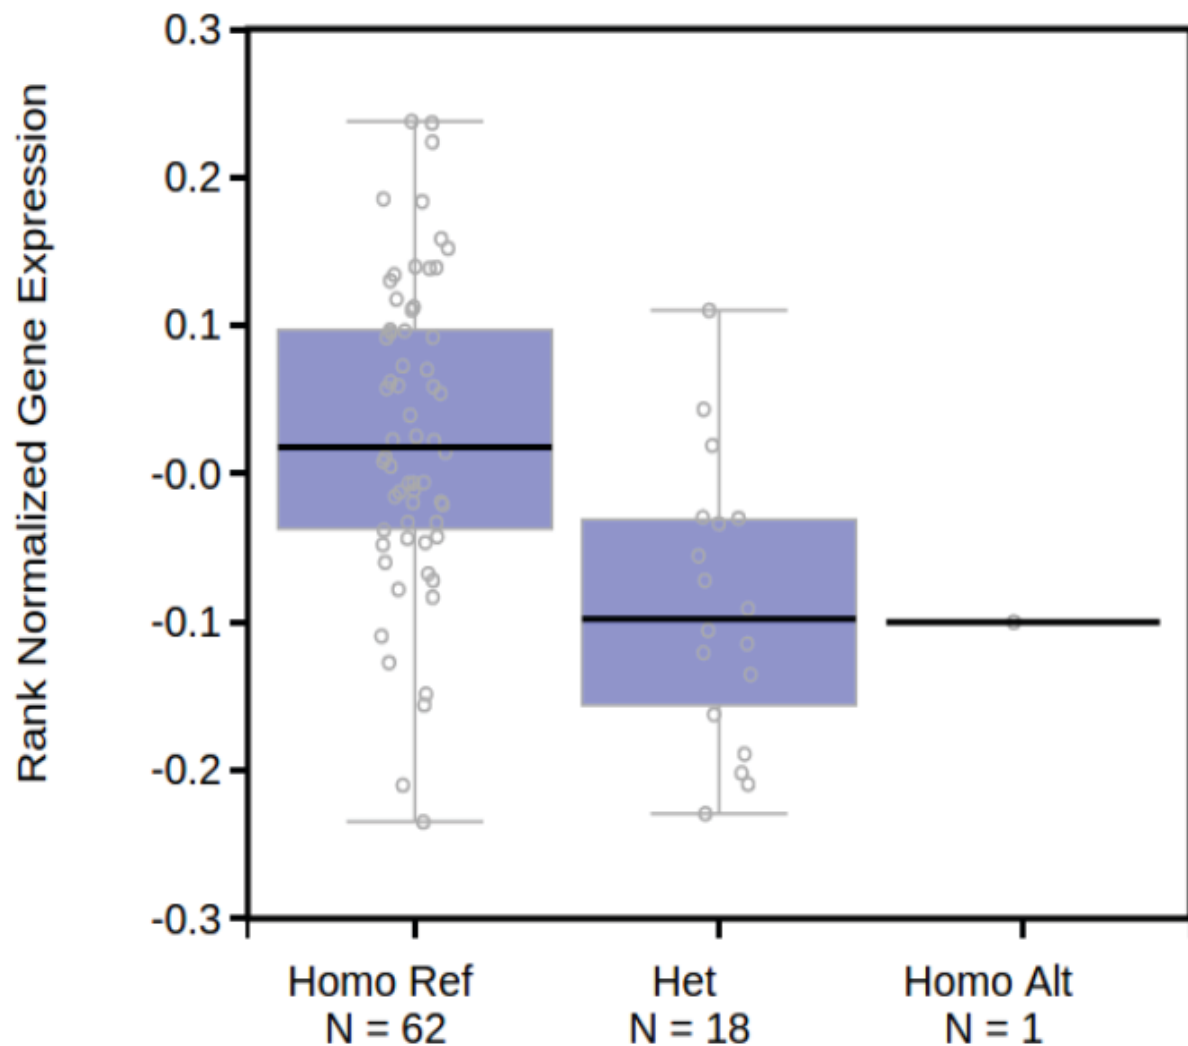

| Group   | Case N. | Diagnosis                                                       | Gender | Age | PMD (h:min) |
|---------|---------|-----------------------------------------------------------------|--------|-----|-------------|
| Control | C1      | Subcortical infarcts, leukoencephalopathy                       | Male   | 78  | 06:00       |
|         | C2      | Minimal AgD I, mild gliosis, gastric cancer                     | Male   | 76  | 11:30       |
|         | C3      | iLBD Braak 1, NFT I-II, SVD; lung cancer                        | Male   | 78  | 06:00       |
|         | C4      | Right vertebral thrombosis+cerebellar and bulbar ictus, NFT III | Female | 86  | 04:00       |
| PD      | P1      | PD-D, Braak 5, ARP II B                                         | Male   | 78  | 05:15       |
|         | P2      | PD-D, Braak 4-5+ARP II A                                        | Female | 83  | 04:00       |
|         | P3      | PD-D, Braak, 5, ARP II B                                        | Male   | 71  | 05:00       |
|         | P4      | PD-D, Braak 4, ARP III A, SVD                                   | Female | 90  | 05:30       |
|         | P5      | PD-D vs DLB, Braak 5 + NFT II without plaques                   | Female | 75  | 03:45       |
| MSA     | P1      | Parkinsonian MSA, OPCA II, SND III, onset 50                    | Male   | 59  | 04:30       |
|         | P2      | Parkinsonian MSA, OPCA II/III, SND III, onset na                | Female | 52  | 05:30       |
|         | P3      | Parkinsonian MSA, OPCA II, SND III, onset 43                    | Female | 51  | 05:45       |
|         | P4      | Parkinsonian MSA, OPCA II, SND III, onset na                    | Female | 69  | 06:00       |
|         | P5      | Parkinsonian MSA, OPCA II, SND II-III, onset 52                 | Female | 59  | 06:05       |

**Supp. Table 1**

| <b>Group</b> | <b>LRRK2 G2019S</b> | <b>Gender</b> | <b>Age at biopsy</b> | <b>AAO</b> |
|--------------|---------------------|---------------|----------------------|------------|
| control      | negative            | female        | 66                   | n.a.       |
| control      | negative            | male          | 52                   | n.a.       |
| control      | negative            | male          | 66                   | n.a.       |
| control      | negative            | female        | 48                   | n.a.       |
| sPD          | negative            | female        | 62                   | 59         |
| sPD          | negative            | male          | 54                   | 48         |
| sPD          | negative            | female        | 51                   | n.a.       |
| sPD          | negative            | male          | 46                   | 40         |
| L2PD         | positive            | male          | 44                   | 34         |
| L2PD         | positive            | female        | 63                   | 50         |
| L2PD         | positive            | female        | 68                   | 57         |
| MSA-P        | negative            | female        | 62                   | 57         |
| MSA-P        | negative            | male          | 55                   | 43         |
| MSA-P        | negative            | male          | 72                   | 66         |
| MSA-P        | negative            | male          | 62                   | 59         |
| MSA-P        | negative            | female        | 59                   | 57         |

**Supp. Table 2**

| mirna           | target | mirna_start | mirna_stop | rbp    | rbp_start | rbp_stop | conservation | public_hela_avg | internal_hela_avg |
|-----------------|--------|-------------|------------|--------|-----------|----------|--------------|-----------------|-------------------|
| hsa-miR-539     | SNCA   | 276         | 297        | ELAVL1 | 287       | 314      | +            | 0.000           | 1.120             |
| hsa-miR-126*    | SNCA   | 587         | 607        | TIAL1  | 593       | 595      | -            | 2.340           | 0.820             |
| hsa-miR-570     | SNCA   | 306         | 328        | ELAVL1 | 287       | 314      | -            | 0.000           | 0.640             |
| hsa-miR-1224-5p | SNCA   | 287         | 305        | ELAVL1 | 287       | 314      | -            | 0.159           | 4.030             |
| hsa-miR-921     | SNCA   | 283         | 308        | ELAVL1 | 287       | 314      | -            | 0.285           | 1.580             |
| hsa-miR-1294    | SNCA   | 285         | 306        | ELAVL1 | 287       | 314      | -            | 0.536           | 1.580             |
| hsa-miR-3120    | SNCA   | 302         | 323        | ELAVL1 | 287       | 314      | -            | 0.000           | 1.220             |
| hsa-miR-3134    | SNCA   | 572         | 594        | TIAL1  | 593       | 595      | -            | 0.000           | 1.220             |
| hsa-miR-3174    | SNCA   | 283         | 307        | ELAVL1 | 287       | 314      | -            | 1.557           | 1.220             |
| hsa-miR-3065-5p | SNCA   | 298         | 319        | ELAVL1 | 287       | 314      | -            | 0.527           | 3.520             |
| hsa-miR-4316    | SNCA   | 290         | 306        | ELAVL1 | 287       | 314      | -            | 0.000           | 1.840             |

**Supp. Table 3**
