# Supplementary material for: Discovering the 3′ UTR-mediated regulation of alpha-synuclein
Source: Oxford University Press journal article supplement (doi:10.1093/nar/gkx1048), 2017-10-20
Supplement: gkx1048_supp.zip [file gkx1048_supp.zip › nar-01957-n-2017-File013.xls]

## Sheet: 3UTRSNCA_CADD_Score
SNP ID	Comments	TAG	#Chrom	SNP ID	Pos	Ref	Anc	Alt	Type	Length	isTv	isDerived	AnnoType	Consequence	ConsScore	ConsDetail	GC	CpG	mapAbility20bp	mapAbility35bp	scoreSegDup	priPhCons	mamPhCons	verPhCons	priPhyloP	mamPhyloP	verPhyloP	GerpN	GerpS	GerpRS	GerpRSpval	bStatistic	mutIndex	dnaHelT	dnaMGW	dnaProT	dnaRoll	mirSVR-Score	mirSVR-E	mirSVR-Aln	targetScan	fitCons	cHmmTssA	cHmmTssAFlnk	cHmmTxFlnk	cHmmTx	cHmmTxWk	cHmmEnhG	cHmmEnh
rs8180214		OUT of 3’UTR	4		90644508	G	G	A	SNV	0	FALSE	TRUE	RegulatoryFeature	REGULATORY	4	regulatory	0.46	0.03	1	1	NA	0	0	0	-1.632	-2.576	-2.392	1.3	-2.6	NA	NA	770	98	-1.65	0.05	1.03	-0.45	NA	NA	NA	NA	0.102061	0	0	0	0.008	0.11	0.008	0.008
rs561956849		OUT of 3’UTR	4		90644589	T	T	C	SNV	0	FALSE	TRUE	Intergenic	DOWNSTREAM	1	downstream	0.42	0.01	1	1	NA	0.002	0	0	-0.338	-1.981	-1.782	1.65	-3.31	NA	NA	770	12	-3.76	0.09	3.86	1.34	NA	NA	NA	NA	0.102061	0	0	0	0.008	0.11	0.008	0.008
rs144436197		OUT of 3’UTR	4		90644617	T	T	C	SNV	0	FALSE	TRUE	Intergenic	DOWNSTREAM	1	downstream	0.42	0.01	1	1	NA	0	0	0.001	-0.318	0.117	0.146	1.7	0.413	NA	NA	770	-42	-4.17	0.04	4.78	-0.07	NA	NA	NA	NA	0.102061	0	0	0	0.008	0.11	0.008	0.008
rs544322343		OUT of 3’UTR	4		90644621	T	T	A	SNV	0	TRUE	TRUE	Intergenic	DOWNSTREAM	1	downstream	0.42	0.01	1	1	NA	0	0	0	-0.913	-0.798	-0.775	1.93	-2.92	NA	NA	770	-64	-3.14	-0.76	0.92	-1.85	NA	NA	NA	NA	0.102061	0	0	0	0.008	0.11	0.008	0.008
rs185358003		OUT of 3’UTR	4		90644667	C	C	T	SNV	0	FALSE	TRUE	Intergenic	DOWNSTREAM	1	downstream	0.42	0.01	0.25	1	NA	0	0	0	-0.889	-1.206	-1.12	1.93	-3.85	NA	NA	770	39	2.36	0.08	-3.51	0.1	NA	NA	NA	NA	0.102061	0	0	0	0.008	0.11	0.008	0.008
rs532828415		OUT of 3’UTR	4		90644679	T	T	G	SNV	0	TRUE	TRUE	Intergenic	DOWNSTREAM	1	downstream	0.4	0.01	0.333333	1	NA	0.002	0	0	-1.112	-1.52	-1.346	1.93	-3.85	NA	NA	770	-28	-0.35	0.01	2.06	-0.16	NA	NA	NA	NA	0.102061	0	0	0	0.008	0.11	0.008	0.008
rs550965902		OUT of 3’UTR	4		90644682	G	G	C	SNV	0	TRUE	TRUE	Intergenic	DOWNSTREAM	1	downstream	0.4	0.01	1	1	NA	0.037	0.002	0.003	0.651	-0.454	-0.446	1.93	-1.4	NA	NA	770	28	-0.79	0.29	-1.38	6.24	NA	NA	NA	NA	0.102061	0	0	0	0.008	0.11	0.008	0.008
rs189000456		OUT of 3’UTR	4		90644770	C	C	T	SNV	0	FALSE	TRUE	Intergenic	DOWNSTREAM	1	downstream	0.47	0.01	0	1	NA	0.029	0.008	0.009	0.457	1.182	1.18	1.57	1.57	NA	NA	770	30	1.36	0.15	-2.11	-0.19	NA	NA	NA	NA	0.102061	0	0	0	0.008	0.11	0.008	0.008
rs181373232		OUT of 3’UTR	4		90644782	A	A	C	SNV	0	TRUE	TRUE	Intergenic	DOWNSTREAM	1	downstream	0.48	0.01	0.5	1	NA	0.012	0	0	0.53	-0.27	-0.233	1.7	-1.12	NA	NA	770	-42	-1.17	1.23	1.49	7.41	NA	NA	NA	NA	0.102061	0	0	0	0.008	0.11	0.008	0.008
rs185851601		OUT of 3’UTR	4		90644812	C	C	T	SNV	0	FALSE	TRUE	Intergenic	DOWNSTREAM	1	downstream	0.5	0.01	1	1	NA	0.001	0	0	-0.269	-0.874	-0.813	1.52	-2.91	NA	NA	770	78	2.01	0.26	-2.64	-0.86	NA	NA	NA	NA	0.086061	0	0	0	0.016	0.102	0.008	0.016
rs150957046		OUT of 3’UTR	4		90644834	T	T	C	SNV	0	FALSE	TRUE	Intergenic	DOWNSTREAM	1	downstream	0.52	0.01	1	1	NA	0.005	0.002	0.002	0.53	0.65	0.681	0.893	0.893	NA	NA	771	-78	-4.56	0.26	3.93	0.81	NA	NA	NA	NA	0.086061	0	0	0	0.016	0.102	0.008	0.016
rs535694665		OUT of 3’UTR	4		90644843	A	A	G	SNV	0	FALSE	TRUE	Intergenic	DOWNSTREAM	1	downstream	0.5	0.01	1	1	NA	0.003	0	0.001	0.53	-0.115	-0.096	0.893	-0.31	NA	NA	771	-72	-0.07	0.67	4.37	1.8	NA	NA	NA	NA	0.086061	0	0	0	0.016	0.102	0.008	0.016
rs192465339		OUT of 3’UTR	4		90644861	T	T	A	SNV	0	TRUE	TRUE	Intergenic	DOWNSTREAM	1	downstream	0.49	0.01	1	1	NA	0.005	0.001	0.001	0.53	0.211	0.242	1.93	0.732	NA	NA	771	-82	-3.03	0.16	2.45	-0.9	NA	NA	NA	NA	0.035721	0	0	0	0.016	0.102	0.008	0.016
rs569263333		OUT of 3’UTR	4		90644869	T	T	C	SNV	0	FALSE	TRUE	Intergenic	DOWNSTREAM	1	downstream	0.48	0.01	1	1	NA	0.007	0	0	0.457	-0.135	-0.114	1.58	-0.521	NA	NA	771	-66	-4.32	0.17	4.98	0.82	NA	NA	NA	NA	0.035721	0	0	0	0.016	0.102	0.008	0.016
rs539893307		OUT of 3’UTR	4		90644874	C	C	A	SNV	0	TRUE	TRUE	Intergenic	DOWNSTREAM	1	downstream	0.47	0.01	1	1	NA	0	0	0	-2.103	-1.408	-1.376	1.93	-2.59	NA	NA	771	-10	0.78	-0.44	-4.53	-2.65	NA	NA	NA	NA	0.035721	0	0	0	0.016	0.102	0.008	0.016
rs35808877		OUT of 3’UTR	4		90644887	C	C	G	SNV	0	TRUE	TRUE	Intergenic	DOWNSTREAM	1	downstream	0.44	0.01	1	1	NA	0	0	0	-0.18	-0.06	-0.053	1.93	-0.116	NA	NA	771	23	2.78	0.24	-1.29	0.5	NA	NA	NA	NA	0.035721	0	0	0	0.016	0.102	0.008	0.016
rs7675105		OUT of 3’UTR	4		90644960	C	C	T	SNV	0	FALSE	TRUE	Intergenic	DOWNSTREAM	1	downstream	0.44	0.01	1	1	NA	0.107	0.001	0.001	0.64	-0.015	-0.015	1.83	0.00303	NA	NA	771	6	2.28	0.13	-3.43	0.29	NA	NA	NA	NA	0.035721	0	0	0	0.016	0.102	0.008	0.016
rs7675290		OUT of 3’UTR	4		90645003	C	T	T	SNV	0	FALSE	FALSE	Intergenic	DOWNSTREAM	1	downstream	0.5	0.01	1	1	NA	0.001	0	0	0.455	-0.177	-0.151	1.79	-0.722	NA	NA	771	-40	2.01	0.35	-3.22	0.11	NA	NA	NA	NA	0.035721	0	0	0	0.016	0.094	0	0.031
rs150116837		OUT of 3’UTR	4		90645013	A	A	G	SNV	0	FALSE	TRUE	Intergenic	DOWNSTREAM	1	downstream	0.48	0.01	1	1	NA	0.007	0	0	0.455	0.066	0.091	1.58	0.225	NA	NA	771	-41	-0.72	0.45	2.61	2.48	NA	NA	NA	NA	0.035721	0	0	0	0.016	0.094	0	0.031
rs573850452		OUT of 3’UTR	4		90645042	G	G	C	SNV	0	TRUE	TRUE	Intergenic	DOWNSTREAM	1	downstream	0.51	0.01	0	1	NA	0.015	0	0	0.557	-0.652	-0.626	1.79	-2.23	NA	NA	771	10	-0.76	0.45	-0.95	5.79	NA	NA	NA	NA	0.035721	0	0	0	0.016	0.094	0	0.031
rs75352414		OUT of 3’UTR	4		90645082	A	A	C	SNV	0	TRUE	TRUE	Intergenic	DOWNSTREAM	1	downstream	0.47	0	0.5	1	NA	0.006	0.054	0.078	-0.307	0.019	0.05	1.39	0.0868	NA	NA	771	-5	-0.64	0.1	3.18	7.02	NA	NA	NA	NA	0.047798	0	0	0	0.016	0.094	0	0.031
rs141152065		OUT of 3’UTR	4		90645179	C	C	A	SNV	0	TRUE	TRUE	Intergenic	DOWNSTREAM	1	downstream	0.42	0	0.5	1	NA	0.001	0	0	-0.155	-0.279	-0.264	1.47	-0.783	NA	NA	771	3	0.67	0.02	-4.86	-0.63	NA	NA	NA	NA	0.078229	0	0	0	0.016	0.094	0	0.031
rs577366018		OUT of 3’UTR	4		90645180	C	C	A	SNV	0	TRUE	TRUE	Intergenic	DOWNSTREAM	1	downstream	0.42	0	0.5	1	NA	0	0	0	-0.907	-0.916	-0.894	1.69	-2.66	NA	NA	771	8	1.32	-0.55	-5.31	-2.24	NA	NA	NA	NA	0.078229	0	0	0	0.016	0.094	0	0.031
rs147004867		OUT of 3’UTR	4		90645182	C	C	T	SNV	0	FALSE	TRUE	Intergenic	DOWNSTREAM	1	downstream	0.42	0	1	1	NA	0	0	0	-0.155	-1.001	-0.985	1.69	-3.38	NA	NA	771	1	1.4	0.42	-2.66	1.63	NA	NA	NA	NA	0.078229	0	0	0	0.016	0.094	0	0.031
rs138227776		OUT of 3’UTR	4		90645221	G	G	C	SNV	0	TRUE	TRUE	Intergenic	DOWNSTREAM	1	downstream	0.34	0	1	1	NA	0.161	0.012	0.015	0.651	0.117	0.125	1.47	0.459	NA	NA	771	1	-0.77	0.48	-0.52	5.79	NA	NA	NA	NA	0.08445	0	0	0	0.016	0.102	0	0.016
rs527275128		OUT of 3’UTR	4		90645232	A	A	G	SNV	0	FALSE	TRUE	Intergenic	DOWNSTREAM	1	downstream	0.35	0	1	1	NA	0.014	0	0	-0.246	-0.639	-0.615	1.69	-1.94	NA	NA	771	-21	0.74	0.3	1.63	1.56	NA	NA	NA	NA	0.08445	0	0	0	0.016	0.102	0	0.016
rs548938652			4		90645257	A	A	T	SNV	0	TRUE	TRUE	Intergenic	DOWNSTREAM	1	downstream	0.33	0	0	1	NA	0.038	0	0	0.255	-0.396	-0.354	1.07	-1.15	NA	NA	771	-5	-0.78	0.96	2.84	9.88	-0.9177	-6.45	146	NA	0.08445	0	0	0	0.016	0.102	0	0.016
rs143616400			4		90645406	C	C	A	SNV	0	TRUE	TRUE	Intergenic	DOWNSTREAM	1	downstream	0.44	0.03	1	1	NA	0.002	0.003	0.004	0.651	0.822	0.822	3.14	2.25	NA	NA	771	3	0.6	-0.24	-4.78	-1.28	-0.0159	-14.31	144	NA	0.074678	0	0	0	0.016	0.118	0	0.031
rs529553259			4		90645459	T	T	A	SNV	0	TRUE	TRUE	Intergenic	DOWNSTREAM	1	downstream	0.44	0.03	1	1	NA	0.014	0	0	0.53	0.046	0.085	2.79	0.219	NA	NA	771	-37	-2.83	-0.76	0.92	-2.33	-0.2422	-24.17	155	NA	0.074678	0	0	0	0.016	0.118	0	0.031
rs550895688			4		90645488	G	G	A	SNV	0	FALSE	TRUE	Intergenic	DOWNSTREAM	1	downstream	0.46	0.04	1	1	NA	0.001	0	0	-0.155	-1.044	-1.022	3.14	-3.51	NA	NA	771	25	-1.9	-0.3	1.17	-1.11	-0.8292	-16.18	150	NA	0.074678	0	0	0	0.016	0.118	0	0.031
rs375815714			4		90645502	T	T	G	SNV	0	TRUE	TRUE	Intergenic	DOWNSTREAM	1	downstream	0.46	0.04	1	1	NA	0.136	0.004	0.007	0.53	0.258	0.301	3.14	1.12	NA	NA	771	14	-0.66	-0.21	3.77	-2.06	-0.041	-16.79	124	NA	0.074678	0	0	0	0.016	0.118	0	0.031
rs183802441			4		90645549	C	C	T	SNV	0	FALSE	TRUE	Intergenic	DOWNSTREAM	1	downstream	0.4	0.01	1	1	NA	0.001	0.003	0.004	-0.289	0.825	0.822	3.05	2.18	NA	NA	771	10	2.35	0.19	-2.76	0.26	-0.2513	-30.31	124	NA	0.074678	0	0	0	0.016	0.118	0	0.031
rs551886776			4		90645552	G	G	T	SNV	0	TRUE	TRUE	Intergenic	DOWNSTREAM	1	downstream	0.42	0.01	1	1	NA	0.001	0	0.001	-1.195	-0.508	-0.441	3.05	-2.76	NA	NA	771	92	1.05	0.55	-1.43	7.41	-0.2513	-30.31	124	NA	0.074678	0	0	0	0.016	0.118	0	0.031
rs566899780			4		90645576	C	C	T	SNV	0	FALSE	TRUE	Intergenic	DOWNSTREAM	1	downstream	0.37	0.01	1	1	NA	0.096	0.002	0.002	-0.222	-0.064	-0.061	2.84	-0.111	NA	NA	771	21	2.15	0.22	-2.62	0.64	-0.2494	-16.91	146	NA	0.074678	0	0	0	0.016	0.118	0	0.031
rs1045722			4		90645671	T	A	A	SNV	0	TRUE	FALSE	Intergenic	DOWNSTREAM	1	downstream	0.27	0.01	1	1	NA	0.001	0.001	0.001	0.379	0.076	0.109	1.56	0.29	NA	NA	771	-12	-2.42	-0.14	0.89	-2.9	-0.5697	-14.26	144	NA	0.061782	0	0	0	0.008	0.126	0	0.039
rs555697933			4		90645673	C	C	T	SNV	0	FALSE	TRUE	Intergenic	DOWNSTREAM	1	downstream	0.28	0.01	1	1	NA	0.003	0.002	0.002	0.462	0.315	0.328	1.84	0.965	NA	NA	771	12	2.25	0.14	-2.8	-0.34	-0.5697	-14.26	144	NA	0.061782	0	0	0	0.008	0.126	0	0.039
rs3857053			4		90645674	C	T	T	SNV	0	FALSE	FALSE	Intergenic	DOWNSTREAM	1	downstream	0.28	0.01	1	1	NA	0.002	0	0	0.379	0.114	0.168	1.84	0.48	NA	NA	771	89	1.58	0.07	-2.06	-0.06	-0.5697	-14.26	144	NA	0.061782	0	0	0	0.008	0.126	0	0.039
rs538140807			4		90645747	C	C	T	SNV	0	FALSE	TRUE	Intergenic	DOWNSTREAM	1	downstream	0.32	0.01	1	1	NA	0.044	0	0	0.651	0.087	0.098	2.41	0.531	NA	NA	771	-48	2.23	0.55	-2.79	-0.07	-0.5644	-13.1	148	NA	0.0944	0	0	0	0.008	0.126	0	0.039
rs186189862			4		90645883	G	G	A	SNV	0	FALSE	TRUE	RegulatoryFeature	REGULATORY	4	regulatory	0.25	0.01	1	1	NA	0.001	0	0	-0.309	-0.024	0.019	2.51	-0.0643	NA	NA	771	82	-2.25	-0.01	1.52	-0.93	-0.686	-16.38	122	NA	0.122223	0	0	0	0.008	0.118	0	0.087
rs561717303			4		90645886	A	A	G	SNV	0	FALSE	TRUE	RegulatoryFeature	REGULATORY	4	regulatory	0.26	0.01	1	1	NA	0.019	0.001	0.002	0.53	0.076	0.112	3.02	0.328	NA	NA	771	-53	0.53	0.21	3.14	1.58	-0.686	-16.38	122	NA	0.122223	0	0	0	0.008	0.118	0	0.087
rs544732987			4		90645922	A	A	G	SNV	0	FALSE	TRUE	RegulatoryFeature	REGULATORY	4	regulatory	0.31	0.01	1	1	NA	0.12	0	0	0.478	-0.473	-0.375	2.5	-2.36	NA	NA	771	-10	-1.4	1.36	5.96	4.41	-0.6868	-6.42	123	NA	0.102061	0	0	0	0.008	0.118	0	0.087
rs17016072		RBP for ELAVL1	4		90646102	G	G	A	SNV	0	FALSE	TRUE	RegulatoryFeature	REGULATORY	4	regulatory	0.34	0.01	1	1	NA	0.007	0.006	0.006	0.651	0.549	0.539	3.77	2	NA	NA	771	83	-2.04	-0.1	1.4	-0.36	-0.4869	-31.97	120	NA	0.225594	0	0	0	0.008	0.126	0	0.079
rs571776435		RBP for ELAVL1	4		90646106	A	A	G	SNV	0	FALSE	TRUE	RegulatoryFeature	REGULATORY	4	regulatory	0.34	0.01	1	1	NA	0.004	0	0	-0.295	-0.247	-0.195	3.88	-1.65	NA	NA	771	-6	0.22	0.76	2.8	2.93	-0.2981	-19.64	122	NA	0.225594	0	0	0	0.008	0.126	0	0.079
rs190662034			4		90646133	A	A	G	SNV	0	FALSE	TRUE	RegulatoryFeature	REGULATORY	4	regulatory	0.34	0.01	1	1	NA	0.003	0.001	0.001	0.53	0.799	0.856	3.88	2.64	NA	NA	771	7	-0.22	0.93	4.4	1.99	-0.5692	-13.08	143	NA	0.122223	0	0	0	0.008	0.126	0	0.079
rs560896156			4		90646302	A	A	G	SNV	0	FALSE	TRUE	Intergenic	DOWNSTREAM	1	downstream	0.3	0	1	1	NA	0.031	0.004	0.005	0.525	1.923	2	3.73	3.73	NA	NA	771	-5	0.55	0.42	2.08	2.04	-0.5509	-12.9	121	NA	0.122223	0	0	0	0.008	0.134	0	0.079
rs529496201			4		90646373	C	C	T	SNV	0	FALSE	TRUE	Intergenic	DOWNSTREAM	1	downstream	0.36	0.01	1	1	NA	0.03	0.073	0.108	-0.269	0.54	0.586	2.96	1.79	NA	NA	771	7	1.07	-0.18	-1.82	0.06	-1.0371	-12.41	141	NA	0.061782	0	0	0	0.008	0.134	0	0.079
rs377356638			4		90646492	C	C	T	SNV	0	FALSE	TRUE	Intergenic	DOWNSTREAM	1	downstream	0.33	0.03	0.25	1	NA	0.001	0	0	-1.811	-2.635	-2.543	0.949	-1.9	NA	NA	771	96	1.48	0.21	-2.79	0.34	-0.2815	-18.86	158	NA	0.070777	0	0	0	0.008	0.157	0	0.047
rs533408267;rs141457381	This is a deletion spanning the next 4bp. SNP ID is not clear in 1000G.	RBP for ELAVL1	4		90646501	AAGAG	AAGAG	A	DEL	4	NA	TRUE	Intergenic	DOWNSTREAM	1	downstream	0.33	0.03	0	1	NA	0.002	0.001	0.001	0.109	0.37	0.383	0.401	0.329	NA	NA	771	30	1.08	-0.98	-4.09	-4.16	-0.2167	-14.98	150	NA	0.070777	0	0	0	0.008	0.157	0	0.047
rs533408267;rs141457381	This is a deletion spanning the next 2bp. SNP ID is not clear in 1000G.	RBP for ELAVL1	4		90646503	GAG	GAG	G	DEL	2	NA	TRUE	Intergenic	DOWNSTREAM	1	downstream	0.33	0.03	0	1	NA	0.001	0	0	-0.464	-0.455	-0.432	0.401	-0.639	NA	NA	771	30	1.08	-0.98	-4.09	-4.16	-0.2167	-14.98	150	NA	0.070777	0	0	0	0.008	0.157	0	0.047
rs147204331			4		90646555	C	C	T	SNV	0	FALSE	TRUE	Intergenic	DOWNSTREAM	1	downstream	0.35	0.01	1	1	NA	0.016	0	0	-0.281	-0.632	-0.615	2.66	-2.47	NA	NA	771	11	2.23	0.22	-2.62	0.25	-0.7546	-8.9	125	NA	0.083462	0	0	0	0.008	0.157	0	0.047
rs533541220			4		90646570	T	T	C	SNV	0	FALSE	TRUE	Intergenic	DOWNSTREAM	1	downstream	0.37	0	1	1	NA	0.068	0.05	0.061	0.53	1.477	1.53	2.66	2.66	NA	NA	771	-27	-3.71	-0.27	3.91	0.43	-0.2792	-7.19	123	NA	0.083462	0	0	0	0.008	0.157	0	0.047
rs551974660			4		90646608	G	G	A	SNV	0	FALSE	TRUE	Intergenic	DOWNSTREAM	1	downstream	0.39	0.01	1	1	NA	0.012	0	0	0.645	-0.294	-0.268	1.37	-0.717	NA	NA	771	28	-2.04	-0.28	2.16	-1.12	-0.1877	-12.05	122	NA	0.083462	0	0	0	0.008	0.157	0	0.016
rs566987021			4		90646763	A	A	G	SNV	0	FALSE	TRUE	Intergenic	DOWNSTREAM	1	downstream	0.22	0.03	0.5	0.5	NA	0	0	0	0	0	0	0	0	NA	NA	772	-31	-0.39	0.8	4.74	2.18	-0.5615	-9.85	151	NA	0.083462	0	0	0	0.008	0.157	0	0.016
rs182722435			4		90646777	A	A	C	SNV	0	TRUE	TRUE	Intergenic	DOWNSTREAM	1	downstream	0.23	0.03	0.5	0.5	NA	0	0	0	0	0	0	0	0	NA	NA	772	14	-1.05	0.66	4.47	5.8	-0.5615	-9.85	151	NA	0.083462	0	0	0	0.008	0.157	0	0.016
rs148246747			4		90646858	C	C	T	SNV	0	FALSE	TRUE	Intergenic	DOWNSTREAM	1	downstream	0.29	0.03	0.5	0.5	NA	0	0.243	0.27	0	0.542	0.538	0	0	NA	NA	772	28	1.19	0.36	-2.73	0.97	-0.5722	-12.32	129	NA	0.044488	0	0	0	0.008	0.165	0	0
rs187002185			4		90646884	A	A	G	SNV	0	FALSE	TRUE	Intergenic	DOWNSTREAM	1	downstream	0.34	0.01	0.5	0.5	NA	0.02	0.027	0.031	0.3	0.306	0.325	0	0	NA	NA	772	-11	-0.35	0.4	4.34	1.67	-0.0181	-15.12	136	NA	0.044488	0	0	0	0.008	0.165	0	0
rs192179063			4		90646885	C	C	T	SNV	0	FALSE	TRUE	Intergenic	DOWNSTREAM	1	downstream	0.34	0.01	0.5	0.5	NA	0.019	0.025	0.029	0.366	0.362	0.371	0	0	NA	NA	772	112	1.99	0.15	-3.3	1.68	-0.0181	-15.12	136	NA	0.044488	0	0	0	0.008	0.165	0	0
rs356165	THIS IS THE SNP RELATED TO PARKINSON’S		4		90646886	G	G	A	SNV	0	FALSE	TRUE	Intergenic	DOWNSTREAM	1	downstream	0.35	0.01	0.5	0.5	NA	0.016	0.022	0.025	0.366	0.362	0.371	0	0	NA	NA	772	100	-1.97	-0.3	1.17	-0.91	-0.0181	-15.12	136	NA	0.044488	0	0	0	0.008	0.165	0	0
rs577490090			4		90646919	A	A	T	SNV	0	TRUE	TRUE	Intergenic	DOWNSTREAM	1	downstream	0.38	0.01	0.5	0.5	NA	0.006	0.007	0.007	-0.632	-0.649	-0.646	0	0	NA	NA	772	5	-2.23	1.97	3.68	11.49	-0.1681	-14.08	142	NA	0.166641	0	0	0	0.008	0.165	0	0
rs150645039			4		90646927	C	C	A	SNV	0	TRUE	TRUE	Intergenic	DOWNSTREAM	1	downstream	0.4	0.01	0.5	0.5	NA	0.034	0.034	0.035	0	0	0	0	0	NA	NA	772	37	0.42	0	-3.28	-0.5	-0.1681	-14.08	142	NA	0.166641	0	0	0	0.008	0.165	0	0
rs553513542			4		90646929	C	C	T	SNV	0	FALSE	TRUE	Intergenic	DOWNSTREAM	1	downstream	0.4	0.01	0.5	0.5	NA	0.036	0.037	0.037	0	0	0	0	0	NA	NA	772	30	1.34	0.42	-2.66	2.08	-0.1681	-14.08	142	NA	0.166641	0	0	0	0.008	0.165	0	0
rs571813266			4		90646981	C	C	G	SNV	0	TRUE	TRUE	Intergenic	DOWNSTREAM	1	downstream	0.42	0.01	1	1	NA	0.041	0	0	0.645	-0.241	-0.232	3.33	-0.941	NA	NA	772	5	2.87	-0.13	0.62	-1.83	-0.5425	-9.34	122	NA	0.044488	0	0	0	0.008	0.165	0	0
rs373978617			4		90647003	C	C	A	SNV	0	TRUE	TRUE	Intergenic	DOWNSTREAM	1	downstream	0.42	0.01	1	1	NA	0.001	0	0.001	-0.886	-0.155	-0.113	3.4	-1.06	NA	NA	772	-11	0.86	0.2	-3.54	-1.52	-0.2987	-15.02	141	NA	0.166641	0	0	0	0.039	0.126	0	0
rs554306228			4		90647021	A	A	G	SNV	0	FALSE	TRUE	Intergenic	DOWNSTREAM	1	downstream	0.42	0.01	1	1	NA	0.004	0	0	-0.267	-0.153	-0.105	3.17	-0.988	NA	NA	772	-55	0.55	0.42	2.08	2.04	-0.3235	-18.97	154	NA	0.139796	0	0	0	0.039	0.126	0	0
rs575975134			4		90647094	T	T	C	SNV	0	FALSE	TRUE	Intergenic	DOWNSTREAM	1	downstream	0.34	0.01	1	1	NA	0.196	0	0	-0.267	-1.516	-1.191	4.04	-7.83	NA	NA	772	-44	-5.01	0.17	4.98	2.65	-0.5343	-13.69	145	NA	0.044488	0	0	0	0.039	0.126	0	0
rs544604827			4		90647125	G	G	A	SNV	0	FALSE	TRUE	Intergenic	DOWNSTREAM	1	downstream	0.28	0	1	1	NA	0.001	0	0	-0.308	-0.868	-1.086	2.48	-3.04	NA	NA	772	13	-2.95	0.24	2.27	-0.18	-0.0276	-7.24	120	NA	0.044488	0	0	0	0.039	0.126	0	0
rs563195772			4		90647129	T	T	A	SNV	0	TRUE	TRUE	Intergenic	DOWNSTREAM	1	downstream	0.26	0	1	1	NA	0.001	0	0	-0.282	0.06	0.045	4.01	0.283	NA	NA	772	-45	-3.8	0.16	2.92	-0.92	-0.9331	-17.56	165	NA	0.044488	0	0	0	0.039	0.126	0	0
rs35101723			4		90647186	G	G	T	SNV	0	TRUE	TRUE	Intergenic	DOWNSTREAM	1	downstream	0.23	0.01	1	1	NA	0.874	0	0.001	0.645	0.035	0.054	4.2	0.426	NA	NA	772	20	0.58	0.54	-1.62	4.85	-0.9577	-3.02	140	NA	0.044488	0	0	0	0.039	0.126	0	0
rs545627654		RBP for TIAL1	4		90647193	T	T	C	SNV	0	FALSE	TRUE	Intergenic	DOWNSTREAM	1	downstream	0.24	0.01	0	1	NA	0.798	0	0	0.525	-0.303	-0.25	3.7	-1.82	NA	NA	772	7	-3.67	-0.03	4.32	0.21	-0.8869	-11.69	131	NA	0.044488	0	0	0	0.039	0.126	0	0
rs560621582		RBP for TIAL1	4		90647277	C	C	T	SNV	0	FALSE	TRUE	Transcript	3PRIME_UTR	2	3_prime_UTR	0.23	0.03	1	1	NA	0.663	0.997	1	0.645	2.797	2.416	4.53	4.53	1367.6	1.88654e-201	772	65	1.49	0.2	-2.41	-0.35	-0.8258	-10.98	143	NA	0.164107	0	0	0	0.047	0.118	0	0
rs17016074		RBP for TIAL1	4		90647278	G	A	A	SNV	0	FALSE	FALSE	Transcript	3PRIME_UTR	2	3_prime_UTR	0.23	0.03	1	1	NA	0.6	0.995	1	0.525	2.257	3.385	4.53	4.53	1367.6	1.88654e-201	772	83	-2.07	0.12	1.38	-0.58	-0.045	-11.31	129	NA	0.164107	0	0	0	0.047	0.118	0	0
rs183204610			4		90647315	G	G	T	SNV	0	TRUE	TRUE	Transcript	3PRIME_UTR	2	3_prime_UTR	0.25	0.03	1	1	NA	0.994	1	1	0.645	1.551	2.641	4.63	3.79	1367.6	1.88654e-201	772	-8	0.7	0.92	-1.22	4.78	-0.6343	-9.6	126	78	0.164107	0	0	0	0.047	0.118	0	0
rs567582133			4		90647356	T	T	C	SNV	0	FALSE	TRUE	Transcript	3PRIME_UTR	2	3_prime_UTR	0.21	0.01	1	1	NA	0.427	0.979	0.975	-0.35	-0.083	-0.163	4.63	-0.712	1367.6	1.88654e-201	772	-2	-3.77	0.15	3.22	1.07	-1.2072	-5.36	152	NA	0.322464	0	0	0	0.047	0.118	0	0
rs35733299			4		90647403	G	G	A	SNV	0	FALSE	TRUE	Transcript	3PRIME_UTR	2	3_prime_UTR	0.25	0.01	1	1	NA	0.991	1	1	0.645	2.854	2.619	4.63	4.63	1367.6	1.88654e-201	772	35	-1.83	-0.16	1.57	-1.24	-0.8338	-8.94	120	NA	0.295356	0	0	0	0.063	0.102	0	0
rs549732620		RBP for BOTH	4		90647466	A	A	C	SNV	0	TRUE	TRUE	Transcript	3PRIME_UTR	2	3_prime_UTR	0.28	0.01	0.5	1	NA	0.701	0.962	0.918	0.53	0.441	0.218	4.64	1.96	1367.6	1.88654e-201	772	-35	-1.05	0.66	4.47	5.8	-0.856	-10.6	148	NA	0.295356	0	0	0	0.063	0.102	0	0
rs571218440		RBP for ELAVL1	4		90647497	A	A	T	SNV	0	TRUE	TRUE	Transcript	3PRIME_UTR	2	3_prime_UTR	0.34	0.01	0.5	1	NA	0.988	1	1	0.53	2.189	3.321	4.37	4.37	1367.6	1.88654e-201	772	-31	-0.85	1.31	0.67	8.56	-0.1074	-9.12	126	NA	0.295356	0	0	0	0.063	0.102	0	0
rs193289281			4		90647506	G	G	A	SNV	0	FALSE	TRUE	Transcript	3PRIME_UTR	2	3_prime_UTR	0.35	0.01	1	1	NA	0.997	1	1	0.651	2.709	3.984	4.37	4.37	1367.6	1.88654e-201	772	-16	-1.69	0.02	1.84	-1.58	-0.1228	-6.77	132	NA	0.295356	0	0	0	0.063	0.102	0	0
rs553599518		RBP for BOTH	4		90647530	C	C	T	SNV	0	FALSE	TRUE	Transcript	SPLICE_SITE	5	splice,intron,nc	0.37	0.01	1	1	NA	0.597	0.527	0.998	-0.309	0.429	1.169	4.37	1.92	1367.6	1.88654e-201	772	72	1.61	0.07	-2.06	-0.57	-0.917	-12.39	145	NA	0.295356	0	0	0	0.063	0.102	0	0
rs565855781			4		90647571	G	G	A	SNV	0	FALSE	TRUE	NonCodingTranscript	NONCODING_CHANGE	5	non_coding_exon,nc	0.42	0.03	1	1	NA	0.965	1	1	0.651	2.709	2.346	4.37	4.37	1367.6	1.88654e-201	772	-7	-2.36	-0.03	1.66	-1.11	-0.5612	-28.86	140	80	0.295356	0	0	0	0.063	0.102	0	0
rs35716318			4		90647576	C	C	T	SNV	0	FALSE	TRUE	NonCodingTranscript	NONCODING_CHANGE	5	non_coding_exon,nc	0.42	0.03	1	1	NA	0.865	0.878	0.774	0.651	0.34	0.641	4.37	1.65	1367.6	1.88654e-201	772	-6	1.53	-0.18	-1.82	-0.28	-0.5612	-28.86	140	NA	0.295356	0	0	0	0.063	0.102	0	0
rs185476145			4		90647577	A	A	G	SNV	0	FALSE	TRUE	NonCodingTranscript	NONCODING_CHANGE	5	non_coding_exon,nc	0.42	0.03	1	1	NA	0.798	0.809	0.552	0.53	1.016	0.423	4.37	3.21	1367.6	1.88654e-201	772	18	0.75	0.25	2.1	1.22	-0.4807	-18.72	149	NA	0.295356	0	0	0	0.063	0.102	0	0
rs187958987			4		90647605	C	C	G	SNV	0	TRUE	TRUE	NonCodingTranscript	NONCODING_CHANGE	5	non_coding_exon,nc	0.46	0.04	1	1	NA	0.275	0.99	1	0.651	2.709	2.503	4.37	4.37	1367.6	1.88654e-201	772	31	2.65	0.15	-1.22	0.31	-0.2753	-8.74	140	NA	0.295356	0	0	0	0.079	0.087	0	0
rs79726680			4		90647606	C	C	T	SNV	0	FALSE	TRUE	NonCodingTranscript	NONCODING_CHANGE	5	non_coding_exon,nc	0.45	0.03	1	1	NA	0.213	0.857	0.993	-0.14	0.264	0.794	4.37	1.41	1367.6	1.88654e-201	772	99	1.53	0.21	-2.79	-0.13	-0.2753	-8.74	140	NA	0.295356	0	0	0	0.079	0.087	0	0
rs192194319			4		90647607	G	G	A	SNV	0	FALSE	TRUE	NonCodingTranscript	NONCODING_CHANGE	5	non_coding_exon,nc	0.44	0.03	1	1	NA	0.183	0.785	0.98	0.651	1.416	2.513	4.37	3.53	1367.6	1.88654e-201	772	93	-2.83	0.05	1.84	-0.14	-0.2753	-8.74	140	NA	0.295356	0	0	0	0.079	0.087	0	0
rs578250733			4		90647617	G	G	A	SNV	0	FALSE	TRUE	NonCodingTranscript	NONCODING_CHANGE	5	non_coding_exon,nc	0.44	0.03	1	1	NA	0.038	0.01	0.003	-0.126	0.793	0.403	4.37	2.66	1367.6	1.88654e-201	772	12	-2.56	0.01	2.58	-1.13	-0.0239	-21.58	120	NA	0.295356	0	0	0	0.079	0.087	0	0
rs10024743			4		90647640	A	A	C	SNV	0	TRUE	TRUE	NonCodingTranscript	NONCODING_CHANGE	5	non_coding_exon,nc	0.46	0.03	1	1	NA	0.819	0.168	0.823	0.53	-0.067	0.096	4.08	-0.526	1367.6	1.88654e-201	772	0	-1.12	0.71	2.95	8.22	-0.4991	-22.93	154	NA	0.295356	0	0	0	0.079	0.087	0	0
rs560702695			4		90647661	T	T	C	SNV	0	FALSE	TRUE	Intergenic	DOWNSTREAM	1	downstream	0.46	0.03	1	1	NA	0.854	0.52	0.998	0.53	0.121	0.683	4.37	0.65	1367.6	1.88654e-201	772	-37	-3.67	0.26	3.48	0.82	-1.1648	-21.16	151	NA	0.295356	0	0	0	0.079	0.087	0	0
rs184023281			4		90647662	C	C	T	SNV	0	FALSE	TRUE	Intergenic	DOWNSTREAM	1	downstream	0.45	0.03	1	1	NA	0.786	0.381	0.996	0.651	0.275	1.01	4.37	1.47	1367.6	1.88654e-201	772	81	1.51	0.39	-2.95	0.72	-1.1648	-21.16	151	NA	0.295356	0	0	0	0.079	0.087	0	0
rs144511886			4		90647663	G	G	A	SNV	0	FALSE	TRUE	Intergenic	DOWNSTREAM	1	downstream	0.45	0.03	1	1	NA	0.563	0.226	0.98	-0.263	0.23	0.917	3.89	1.14	1367.6	1.88654e-201	772	94	-2.41	0.39	2.23	-0.28	-1.1648	-21.16	151	NA	0.295356	0	0	0	0.079	0.087	0	0
rs144511886			4		90647663	G	G	A	SNV	0	FALSE	TRUE	Transcript	3PRIME_UTR	2	3_prime_UTR	0.45	0.03	1	1	NA	0.563	0.226	0.98	-0.263	0.23	0.917	3.89	1.14	1367.6	1.88654e-201	772	94	-2.41	0.39	2.23	-0.28	-1.1648	-21.16	151	NA	0.295356	0	0	0	0.079	0.087	0	0
rs144511886			4		90647663	G	G	C	SNV	0	TRUE	TRUE	Intergenic	DOWNSTREAM	1	downstream	0.45	0.03	1	1	NA	0.563	0.226	0.98	-0.263	0.23	0.917	3.89	1.14	1367.6	1.88654e-201	772	94	-0.76	0.4	-1.27	6.37	-1.1648	-21.16	151	NA	0.295356	0	0	0	0.079	0.087	0	0
rs144511886			4		90647663	G	G	C	SNV	0	TRUE	TRUE	Transcript	3PRIME_UTR	2	3_prime_UTR	0.45	0.03	1	1	NA	0.563	0.226	0.98	-0.263	0.23	0.917	3.89	1.14	1367.6	1.88654e-201	772	94	-0.76	0.4	-1.27	6.37	-1.1648	-21.16	151	NA	0.295356	0	0	0	0.079	0.087	0	0
rs145304567			4		90647702	G	G	T	SNV	0	TRUE	TRUE	Intergenic	DOWNSTREAM	1	downstream	0.41	0.01	1	1	NA	0.995	1	1	0.651	2.709	3.984	4.37	4.37	1367.6	1.88654e-201	772	28	1.05	0.92	-1.22	4.97	-1.0115	-13.35	148	NA	0.295356	0	0	0	0.079	0.087	0	0
[truncated: 70 more columns]
